# Supplementary material
Source: publisher figshare collection journal article supplement (https://acs.figshare.com/ndownloader/files/3805057)
Supplement: Supplementary file 1 [file 3805057]

## Sheet: Sheet1
Rice Locus Name	RAP (Os ID)	Rice Locus Name	Gene Symbol
LOC_Os01g01060.1	Os01g0100700	LOC_Os01g01060.1
LOC_Os01g01080.2	Os01g0100900	LOC_Os01g01080.2	_
LOC_Os01g05490.1	Os01g0147900		OsSPL
LOC_Os01g06290.3	Os01g0155600	LOC_Os01g05490.1	TPI
LOC_Os01g07760.1	Os01g0172400		tpi*
LOC_Os01g08200.1	Os01g0177200		tpi2
LOC_Os01g11054.2	Os01g0208700	LOC_Os01g06290.3
LOC_Os01g12880.1	Os01g0229200	LOC_Os01g07760.1	PLDalpha1
LOC_Os01g13210.2	Os01g0233000		RPLD1
LOC_Os01g13690.2	Os01g0238500		PLD1
LOC_Os01g14950.1	Os01g0253300		OsPLDalpha1
LOC_Os01g15110.1	Os01g0254900	LOC_Os01g08200.1
LOC_Os01g22010.3	Os01g0323600	LOC_Os01g11054.2	_
LOC_Os01g27880.1	Os01g0376700		PEPC-2
LOC_Os01g32080.1	Os01g0505400	LOC_Os01g12880.1
LOC_Os01g32800.2	Os01g0511300	LOC_Os01g13210.2
LOC_Os01g42294.1	Os01g0607900	LOC_Os01g13690.2
LOC_Os01g42480.2	Os01g0610500	LOC_Os01g14950.1	IMPA1A
LOC_Os01g45274.1	Os01g0639900		rImpa1a
LOC_Os01g46510.2	Os01g0653800		Impa1a
LOC_Os01g46610.1	Os01g0654500		Osimpa1
LOC_Os01g46750.3	Os01g0655800		Osimpalpha1
LOC_Os01g46926.2	Os01g0658400	LOC_Os01g15110.1
LOC_Os01g46980.1	Os01g0659200	LOC_Os01g22010.3	_
LOC_Os01g48280.1	Os01g0673600		OsSAM2
LOC_Os01g49290.1	Os01g0686800		OsSAMS2
LOC_Os01g52390.1	Os01g0721900		OS-SAMS2
LOC_Os01g52790.1	Os01g0728300	LOC_Os01g27880.1
LOC_Os01g55350.1	Os01g0758300	LOC_Os01g32080.1
LOC_Os01g58890.1	Os01g0803200	LOC_Os01g32800.2
LOC_Os01g59790.1	Os01g0813400	LOC_Os01g42294.1	_
LOC_Os01g60190.2	Os01g0817700		OsRPK1
LOC_Os01g60410.3	Os01g0819500		OsJNipponRPK1
LOC_Os01g62244.2	Os01g0839700		OsI219RPK1
LOC_Os01g62290.1	Os01g0840100		OsI9311RPK1
LOC_Os01g63270.1	Os01g0851700	LOC_Os01g42480.2
LOC_Os01g64630.1	Os01g0866100	LOC_Os01g45274.1	_
LOC_Os01g64660.2	Os01g0866400		_
LOC_Os01g65380.1	Os01g0874700	LOC_Os01g46510.2
LOC_Os01g65880.1	Os01g0881300	LOC_Os01g46610.1	_
LOC_Os01g67860.1	Os01g0905800		_
LOC_Os01g68770.1	Os01g0916400	LOC_Os01g46750.3
LOC_Os01g68950.1	Os01g0918300	LOC_Os01g46926.2	UBC5A
LOC_Os01g70140.1	Os01g0925800		OsUBC5a
LOC_Os01g71540.5	Os01g0942900	LOC_Os01g46980.1	VATPE
LOC_Os01g72800.1	Os01g0958100		v-ATP-E
LOC_Os01g73160.1	Os01g0962600	LOC_Os01g48280.1
LOC_Os02g01150.2	Os02g0101500	LOC_Os01g49290.1	RACK1
LOC_Os02g01520.1	Os02g0105500		RACK1A
LOC_Os02g01560.1	Os02g0105900		RWD
LOC_Os02g02410.1	Os02g0115900		OsWD40-21
LOC_Os02g02890.1	Os02g0121300	LOC_Os01g52390.1
LOC_Os02g03260.1	Os02g0125100	LOC_Os01g52790.1
LOC_Os02g04100.1	Os02g0133800	LOC_Os01g55350.1
LOC_Os02g04710.1	Os02g0139650	LOC_Os01g58890.1	OC1
LOC_Os02g04710.1	Os02g0139700		Oc1*
LOC_Os02g05030.1	Os02g0143100		Oc1
LOC_Os02g05630.1	Os02g0149800		OC-I
LOC_Os02g06890.1	Os02g0164800		SPOC-I
LOC_Os02g07870.1	Os02g0175400		OsCP1
LOC_Os02g07930.1	Os02g0175950		Oc
LOC_Os02g07930.1	Os02g0176000	LOC_Os01g59790.1
LOC_Os02g08100.1	Os02g0177600	LOC_Os01g60190.2
LOC_Os02g08350.1	Os02g0179800	LOC_Os01g60410.3
LOC_Os02g09060.1	Os02g0182900	LOC_Os01g62244.2
LOC_Os02g09490.1	Os02g0187800	LOC_Os01g62290.1
LOC_Os02g10510.1	Os02g0198600	LOC_Os01g63270.1	_
LOC_Os02g12680.1	Os02g0218700		Pho2
LOC_Os02g13530.1	Os02g0229000	LOC_Os01g64630.1	_
LOC_Os02g14770.4	Os02g0244700		RAc7
LOC_Os02g14780.2	Os02g0245000	LOC_Os01g64660.2	_
LOC_Os02g18410.1	Os02g0285300		OsFR
LOC_Os02g27760.1	Os02g0478600	LOC_Os01g65380.1
LOC_Os02g32030.1	Os02g0519900	LOC_Os01g65880.1	SWEET1A
LOC_Os02g35144.1	Os02g0557300		OsSWEET1a
LOC_Os02g35950.1	Os02g0567900		SWEET1a
LOC_Os02g36974.4	Os02g0580300	LOC_Os01g67860.1	ALDC1
LOC_Os02g37050.1	Os02g0581000		AldC-1
LOC_Os02g37130.2	Os02g0582200	LOC_Os01g68770.1	_
LOC_Os02g37920.1	Os02g0592300		Os SBP
LOC_Os02g38840.2	Os02g0600400		OsSBP
LOC_Os02g38920.1	Os02g0601300	LOC_Os01g68950.1	_
LOC_Os02g40240.1	Os02g0615800		smt3
LOC_Os02g41630.2	Os02g0626100		SMT3
LOC_Os02g41860.3	Os02g0629200	LOC_Os01g70140.1
LOC_Os02g43670.1	Os02g0653400	LOC_Os01g71540.5
LOC_Os02g43760.1	Os02g0654500	LOC_Os01g72800.1
LOC_Os02g44630.2	Os02g0666200	LOC_Os01g73160.1
LOC_Os02g46962.3	Os02g0697300	LOC_Os02g01150.2	_
LOC_Os02g47140.2	Os02g0699600		OsHPR1
LOC_Os02g47880.2	Os02g0708400		HPR1
LOC_Os02g48480.1	Os02g0715400	LOC_Os02g01520.1
LOC_Os02g50790.2	Os02g0741400	LOC_Os02g01560.1
LOC_Os02g51400.1	Os02g0749150	LOC_Os02g02410.1	_
LOC_Os02g52430.2	Os02g0761900		OsBiP1
LOC_Os02g55010.1	Os02g0793100		BiP1
LOC_Os02g55060.1	Os02g0793700		BiP
LOC_Os02g55590.2	Os02g0799300		Bip3
LOC_Os02g56000.1	Os02g0803700		OsBiP3
LOC_Os02g56280.1	Os02g0806700		BIP1/OsBIP3
LOC_Os02g57690.4	Os02g0822800	LOC_Os02g02890.1	CYC2
LOC_Os02g58340.1	Os02g0830100		cyc2*
LOC_Os03g02040.1	Os03g0111200		cyc2
LOC_Os03g02150.2	Os03g0112101		OsCYP2
LOC_Os03g02150.2	Os03g0112400		Cyp2
LOC_Os03g04930.1	Os03g0142900		OsCYP19-2
LOC_Os03g05730.1	Os03g0151800		CYP19-2
LOC_Os03g06160.1	Os03g0157500		OsCYP-2
LOC_Os03g06670.1	Os03g0162200	LOC_Os02g03260.1
LOC_Os03g07350.1	Os03g0169500	LOC_Os02g04100.1	_
LOC_Os03g07480.3	Os03g0170900		OsPAF1
LOC_Os03g08360.4	Os03g0181500	LOC_Os02g04710.1
LOC_Os03g09250.1	Os03g0192700	LOC_Os02g04710.1	_
LOC_Os03g10620.3	Os03g0203200		OsOSC2
LOC_Os03g10620.3	Os03g0203451		CAS1
LOC_Os03g11230.1	Os03g0210700	LOC_Os02g05030.1
LOC_Os03g12030.1	Os03g0220100	LOC_Os02g05630.1
LOC_Os03g12150.1	Os03g0221700	LOC_Os02g06890.1
LOC_Os03g12250.1	Os03g0223000	LOC_Os02g07870.1
LOC_Os03g12500.1	Os03g0225900	LOC_Os02g07930.1
LOC_Os03g13970.2	Os03g0243300	LOC_Os02g07930.1	_
LOC_Os03g14530.1	Os03g0249400		OsBBX2
LOC_Os03g14690.1	Os03g0251500	LOC_Os02g08100.1	4CL3
LOC_Os03g15790.1	Os03g0264600		Os4CL3
LOC_Os03g15810.1	Os03g0264800	LOC_Os02g08350.1
LOC_Os03g16369.2	Os03g0270200	LOC_Os02g09060.1
LOC_Os03g16800.1	Os03g0275500	LOC_Os02g09490.1	GH2
LOC_Os03g16860.2	Os03g0276500		gh2
LOC_Os03g16980.2	Os03g0278000		CAD2
LOC_Os03g17690.1	Os03g0285700		CAD
LOC_Os03g18130.1	Os03g0291500		OsCAD2
LOC_Os03g18220.1	Os03g0293500		GH2
LOC_Os03g18300.1	Os03g0294100	LOC_Os02g10510.1
LOC_Os03g18570.1	Os03g0297100	LOC_Os02g12680.1	HPL2, AOS3
LOC_Os03g18580.1	Os03g0297300		OsHPL2
LOC_Os03g18850.1	Os03g0300400		OsAOS3
LOC_Os03g19410.1	Os03g0307100	LOC_Os02g13530.1
LOC_Os03g20630.1	Os03g0322500	LOC_Os02g14770.4	_
LOC_Os03g21040.2	Os03g0327600		PEPC-1
LOC_Os03g22120.3	Os03g0340500	LOC_Os02g14780.2
LOC_Os03g25150.1	Os03g0367101	LOC_Os02g18410.1
LOC_Os03g25150.1	Os03g0367200	LOC_Os02g27760.1
LOC_Os03g27120.1	Os03g0388900	LOC_Os02g32030.1	_
LOC_Os03g27310.2	Os03g0390600		_
LOC_Os03g28330.4	Os03g0401300	LOC_Os02g35144.1
LOC_Os03g29190.1	Os03g0405500	LOC_Os02g35950.1
LOC_Os03g29240.1	Os03g0405900	LOC_Os02g36974.4	GID2
LOC_Os03g31400.1	Os03g0427900		gid2
LOC_Os03g38000.2	Os03g0577000		GF14e
LOC_Os03g40270.1	Os03g0599800		OsGF14e
LOC_Os03g47770.1	Os03g0681400	LOC_Os02g37050.1
LOC_Os03g49380.1	Os03g0700700	LOC_Os02g37130.2
LOC_Os03g50290.2	Os03g0710800	LOC_Os02g37920.1	_
LOC_Os03g50450.1	Os03g0712400		OsPMS1
LOC_Os03g50885.1	Os03g0718100		OsPMS2
LOC_Os03g51150.1	Os03g0721300	LOC_Os02g38840.2	_
LOC_Os03g53190.2	Os03g0743400		OsG6PDH1
LOC_Os03g54050.2	Os03g0751600	LOC_Os02g38920.1	_
LOC_Os03g54790.1	Os03g0755100		_
LOC_Os03g55070.1	Os03g0757900	LOC_Os02g40240.1	_
LOC_Os03g55150.4	Os03g0758800		LP2
LOC_Os03g57220.2	Os03g0786100	LOC_Os02g41630.2	PAL1
LOC_Os03g58470.1	Os03g0799000		OsPAL
LOC_Os03g58840.1	Os03g0803000		Pal1*
LOC_Os03g59060.2	Os03g0805300		Pal1
LOC_Os03g59310.1	Os03g0807800		PAL
LOC_Os03g59360.1	Os03g0808300		Pal_1
LOC_Os03g60620.1	Os03g0821100		PalI
LOC_Os03g61930.3	Os03g0835600		PAL2
LOC_Os03g63480.1	Os03g0851700		OsPAL01
LOC_Os03g63580.1	Os03g0852800	LOC_Os02g41860.3	PIP2;2
LOC_Os04g01250.2	Os04g0102700		OsPIP2;2
LOC_Os04g17100.1	Os04g0244800		PIP2-2
LOC_Os04g20960.1	Os04g0278200	LOC_Os02g43670.1
LOC_Os04g23890.3	Os04g0304200	LOC_Os02g43760.1
LOC_Os04g28520.1	Os04g0353600	LOC_Os02g44630.2	PIP1A, PIP1;1
LOC_Os04g30240.1	Os04g0370900		OsPIP1a
LOC_Os04g32650.1	Os04g0398300		OsPIP1;1
LOC_Os04g33450.2	Os04g0408600		PIP1a
LOC_Os04g33520.1	Os04g0410400		RWC-1
LOC_Os04g33780.1	Os04g0414100		PIP1-1
LOC_Os04g35570.1	Os04g0435700		RWC1
LOC_Os04g39150.1	Os04g0465600		PIP1A
LOC_Os04g40630.1	Os04g0482300		rwc1
LOC_Os04g40950.1	Os04g0486600	LOC_Os02g46962.3
LOC_Os04g41470.1	Os04g0492100	LOC_Os02g47140.2
LOC_Os04g42600.2	Os04g0504800	LOC_Os02g47880.2
LOC_Os04g45070.1	Os04g0533300	LOC_Os02g48480.1
LOC_Os04g46960.4	Os04g0556300	LOC_Os02g50790.2
LOC_Os04g47310.1	Os04g0560700	LOC_Os02g51400.1
LOC_Os04g47690.1	Os04g0564600	LOC_Os02g52430.2
LOC_Os04g50204.1	Os04g0592400	LOC_Os02g55010.1
LOC_Os04g52164.1	Os04g0611200	LOC_Os02g55060.1
LOC_Os04g52164.1	Os04g0611267	LOC_Os02g55590.2
LOC_Os04g52200.1	Os04g0611500	LOC_Os02g56000.1	_
LOC_Os04g53240.1	Os04g0624000		TBPOs-1
LOC_Os04g55480.1	Os04g0648500	LOC_Os02g56280.1
LOC_Os04g56160.1	Os04g0656100	LOC_Os02g57690.4
LOC_Os04g56350.1	Os04g0658600	LOC_Os02g58340.1
LOC_Os04g56520.2	Os04g0660400	LOC_Os03g02040.1
LOC_Os04g56740.1	Os04g0663100	LOC_Os03g02150.2
LOC_Os04g57400.1	Os04g0669800	LOC_Os03g02150.2
LOC_Os04g58240.1	Os04g0679100	LOC_Os03g04930.1
LOC_Os04g59394.2	Os04g0690300	LOC_Os03g05730.1
LOC_Os05g01470.2	Os05g0105000	LOC_Os03g06160.1
LOC_Os05g01600.1	Os05g0106600	LOC_Os03g06670.1
LOC_Os05g01820.1	Os05g0108800	LOC_Os03g07350.1	CSLA4
LOC_Os05g01870.1	Os05g0109200		OsCslA4
LOC_Os05g02530.1	Os05g0116100	LOC_Os03g07480.3	SUT1
LOC_Os05g04510.1	Os05g0135700		OsSUT1
LOC_Os05g04520.1	Os05g0135800	LOC_Os03g08360.4	_
LOC_Os05g05680.1	Os05g0149400		ONI1
LOC_Os05g06770.1	Os05g0160200	LOC_Os03g09250.1	INO1
LOC_Os05g07940.1	Os05g0171900		OsINO1
LOC_Os05g08970.1	Os05g0182600		MIPS
LOC_Os05g09440.1	Os05g0186300		IPS
LOC_Os05g22970.1	Os05g0295800		RINO1
LOC_Os05g25640.1	Os05g0320700		OsINO1-1
LOC_Os05g27940.1	Os05g0346300	LOC_Os03g10620.3	D14
LOC_Os05g28290.1	Os05g0350600		d14(d10)
LOC_Os05g28740.1	Os05g0355400		dwf13
LOC_Os05g30750.1	Os05g0370600		d10
LOC_Os05g31750.1	Os05g0382600		d14
LOC_Os05g32570.1	Os05g0392000		D88
LOC_Os05g33360.1	Os05g0402300		HTD2
LOC_Os05g33380.1	Os05g0402700		OsD14
LOC_Os05g33570.2	Os05g0405000	LOC_Os03g10620.3
LOC_Os05g34270.1	Os05g0414700	LOC_Os03g11230.1
LOC_Os05g35460.1	Os05g0429400	LOC_Os03g12030.1
LOC_Os05g37330.1	Os05g0445500	LOC_Os03g12150.1
LOC_Os05g37450.1	Os05g0446900	LOC_Os03g12250.1
LOC_Os05g38290.1	Os05g0457200	LOC_Os03g12500.1	AOS2
LOC_Os05g38640.1	Os05g0461400		OsAOS2
LOC_Os05g41210.1	Os05g0491100		CYP74A2
LOC_Os05g41480.2	Os05g0494500		OsAOS
LOC_Os05g44770.1	Os05g0522600		OsAOS1
LOC_Os05g45660.2	Os05g0533100	LOC_Os03g13970.2	_
LOC_Os05g46560.2	Os05g0543200		OsS5a
LOC_Os05g48020.1	Os05g0553700	LOC_Os03g14530.1
LOC_Os05g49180.1	Os05g0566900	LOC_Os03g14690.1
LOC_Os05g49860.1	Os05g0574300	LOC_Os03g15790.1
LOC_Os05g49890.2	Os05g0574500	LOC_Os03g15810.1
LOC_Os05g50624.2	Os05g0583100	LOC_Os03g16369.2
LOC_Os05g51480.1	Os05g0592400	LOC_Os03g16800.1
LOC_Os06g01500.1	Os06g0104400	LOC_Os03g16860.2	HSP71.1
LOC_Os06g02144.2	Os06g0111500		OsHsp71.1
LOC_Os06g02370.3	Os06g0113900		OsHSP71.1
LOC_Os06g03920.1	Os06g0129800	LOC_Os03g16980.2	_
LOC_Os06g04130.1	Os06g0132100		UXS
LOC_Os06g04270.1	Os06g0133800		UXS-3
LOC_Os06g04290.1	Os06g0134000	LOC_Os03g17690.1	APX1
LOC_Os06g05860.1	Os06g0151900		OsAPX1
LOC_Os06g07200.1	Os06g0168500		APXa
LOC_Os06g07210.1	Os06g0168600		OsAPx01
LOC_Os06g07630.1	Os06g0173100		OsAPx1
LOC_Os06g07878.1	Os06g0176000		OSAPX1
LOC_Os06g09450.4	Os06g0194900		APx1
LOC_Os06g12690.1	Os06g0233400		cAPX
LOC_Os06g13570.1	Os06g0244100	LOC_Os03g18130.1	ASN1
LOC_Os06g14370.3	Os06g0254700		OsASN1
LOC_Os06g15360.1	Os06g0264300	LOC_Os03g18220.1	PDC2
LOC_Os06g17440.1	Os06g0284800		pdc2*
LOC_Os06g18670.1	Os06g0289900		pdc2
LOC_Os06g19070.1	Os06g0294600	LOC_Os03g18300.1
LOC_Os06g22060.1	Os06g0326400	LOC_Os03g18570.1
LOC_Os06g23440.1	Os06g0342200	LOC_Os03g18580.1
LOC_Os06g30970.1	Os06g0506600	LOC_Os03g18850.1	JIOSPR10
LOC_Os06g34690.1	Os06g0538000		JIOsPR10
LOC_Os06g37180.1	Os06g0568200	LOC_Os03g19410.1
LOC_Os06g37440.1	Os06g0571400	LOC_Os03g20630.1
LOC_Os06g39370.1	Os06g0594400	LOC_Os03g21040.2
LOC_Os06g39760.1	Os06g0598900	LOC_Os03g22120.3	RSUS4
LOC_Os06g40040.2	Os06g0602600		SUS4
LOC_Os06g40560.1	Os06g0607800		SS4
LOC_Os06g40640.1	Os06g0608700		OsScS4
LOC_Os06g42540.1	Os06g0631800		RSs4
LOC_Os06g43660.3	Os06g0644200		RSus4
LOC_Os06g44080.1	Os06g0650100		OsSUS4
LOC_Os06g45120.2	Os06g0662000	LOC_Os03g25150.1
LOC_Os06g49800.1	Os06g0712400	LOC_Os03g25150.1
LOC_Os06g50580.1	Os06g0720700	LOC_Os03g27120.1
LOC_Os06g51220.2	Os06g0728000	LOC_Os03g27310.2	_
LOC_Os06g51350.1	Os06g0729800		_
LOC_Os06g51510.1	Os06g0731800	LOC_Os03g28330.4	RSUS1
LOC_Os07g01860.1	Os07g0109400		sus1
LOC_Os07g03230.1	Os07g0124500		RSus1(t)
LOC_Os07g04840.1	Os07g0141400		SUS1
LOC_Os07g05580.1	Os07g0150200		SS2
LOC_Os07g05820.1	Os07g0152900		OsScS2
LOC_Os07g07690.2	Os07g0173300		RSs2
LOC_Os07g07690.2	Os07g0173400		RSus1
LOC_Os07g08840.1	Os07g0186000		SuSy1
LOC_Os07g09340.1	Os07g0191200		OsSUS1
LOC_Os07g12110.1	Os07g0222300	LOC_Os03g29190.1
LOC_Os07g12170.1	Os07g0223100	LOC_Os03g29240.1
LOC_Os07g18050.1	Os07g0281000	LOC_Os03g31400.1
LOC_Os07g22640.1	Os07g0409100	LOC_Os03g38000.2
LOC_Os07g26690.1	Os07g0448800	LOC_Os03g40270.1	UAM1
LOC_Os07g30020.1	Os07g0483500		OsUAM1
LOC_Os07g31280.1	Os07g0495100	LOC_Os03g47770.1
LOC_Os07g33110.2	Os07g0515100	LOC_Os03g49380.1	LOX1
LOC_Os07g34260.1	Os07g0526400		OsLOX1
LOC_Os07g35310.1	Os07g0537500		OsLOX5
LOC_Os07g36080.3	Os07g0544800	LOC_Os03g50290.2	GF14F
LOC_Os07g36140.1	Os07g0545400		GF14f
LOC_Os07g37750.1	Os07g0564700		SR14-3-3
LOC_Os07g37750.1	Os07g0564750		OsGF14f
LOC_Os07g38170.1	Os07g0569100		S94
LOC_Os07g38840.2	Os07g0575900		ric1
LOC_Os07g40740.1	Os07g0598400	LOC_Os03g50450.1
LOC_Os07g43170.3	Os07g0624700	LOC_Os03g50885.1	ACT1
LOC_Os07g45300.1	Os07g0647300		act1
LOC_Os07g46370.1	Os07g0657200		AC1
LOC_Os07g46790.1	Os07g0662900		RAC1
LOC_Os07g47510.1	Os07g0671800		RAc1
LOC_Os07g49330.3	Os07g0694000		ACT11
LOC_Os07g49400.1	Os07g0694700	LOC_Os03g51150.1
LOC_Os08g02120.1	Os08g0113100	LOC_Os03g53190.2
LOC_Os08g02340.1	Os08g0116500	LOC_Os03g54050.2
LOC_Os08g02700.1	Os08g0120600	LOC_Os03g54790.1	ALS1
LOC_Os08g03290.1	Os08g0126300		OsALS1
LOC_Os08g03350.1	Os08g0127100		OsABCB25
LOC_Os08g03640.1	Os08g0130500	LOC_Os03g55070.1
LOC_Os08g05690.1	Os08g0153000	LOC_Os03g55150.4
LOC_Os08g06100.1	Os08g0157500	LOC_Os03g57220.2	GLO1
LOC_Os08g06380.1	Os08g0160500		GLO1
LOC_Os08g06550.1	Os08g0162800		OsGLO1
LOC_Os08g07900.1	Os08g0176300	LOC_Os03g58470.1
LOC_Os08g09240.1	Os08g0191600	LOC_Os03g58840.1
LOC_Os08g09250.1	Os08g0191700	LOC_Os03g59060.2
LOC_Os08g13060.1	Os08g0227100	LOC_Os03g59310.1
LOC_Os08g15230.1	Os08g0250900	LOC_Os03g59360.1
LOC_Os08g17400.1	Os08g0276200	LOC_Os03g60620.1
LOC_Os08g22354.2	Os08g0314800	LOC_Os03g61930.3
LOC_Os08g25734.2	Os08g0345800	LOC_Os03g63480.1
LOC_Os08g27070.1	Os08g0359500	LOC_Os03g63580.1
LOC_Os08g27840.1	Os08g0366000	LOC_Os04g01250.2	_
LOC_Os08g33370.2	Os08g0430500		FAAH
LOC_Os08g34210.1	Os08g0440800	LOC_Os04g17100.1
LOC_Os08g35480.1	Os08g0455800	LOC_Os04g20960.1
LOC_Os08g38300.1	Os08g0490900	LOC_Os04g23890.3
LOC_Os08g38900.1	Os08g0498100	LOC_Os04g28520.1
LOC_Os08g39140.1	Os08g0500700	LOC_Os04g30240.1
LOC_Os08g39850.1	Os08g0509100	LOC_Os04g32650.1
LOC_Os08g41390.2	Os08g0525600	LOC_Os04g33450.2
LOC_Os08g42540.1	Os08g0537800	LOC_Os04g33520.1
LOC_Os08g42740.3	Os08g0540300	LOC_Os04g33780.1
LOC_Os08g43120.1	Os08g0544400	LOC_Os04g35570.1
LOC_Os09g02700.1	Os09g0115400	LOC_Os04g39150.1
LOC_Os09g07830.2	Os09g0252100	LOC_Os04g40630.1
LOC_Os09g10300.1	Os09g0275200	LOC_Os04g40950.1	_
LOC_Os09g14670.1	Os09g0315700		GAPDH
LOC_Os09g26460.1	Os09g0434900	LOC_Os04g41470.1
LOC_Os09g29200.1	Os09g0467200	LOC_Os04g42600.2
LOC_Os09g30418.1	Os09g0482550	LOC_Os04g45070.1	_
LOC_Os09g30418.1	Os09g0482600		_
LOC_Os09g31019.1	Os09g0483200	LOC_Os04g46960.4	_
LOC_Os09g31031.2	Os09g0483400		OsGpx1
LOC_Os09g31080.3	Os09g0484200		GPX1
LOC_Os09g33820.3	Os09g0513100		OsGPx01
LOC_Os09g33930.3	Os09g0514400	LOC_Os04g47310.1
LOC_Os09g35710.1	Os09g0525600	LOC_Os04g47690.1
LOC_Os09g36770.2	Os09g0538800	LOC_Os04g50204.1
LOC_Os09g38030.2	Os09g0553200	LOC_Os04g52164.1
LOC_Os09g38090.1	Os09g0553900	LOC_Os04g52164.1
LOC_Os09g39670.1	Os09g0570300	LOC_Os04g52200.1
LOC_Os10g08550.3	Os10g0167300	LOC_Os04g53240.1	ATG8B
LOC_Os10g08930.1	Os10g0170200		OsATG8b
LOC_Os10g10244.1	Os10g0182000	LOC_Os04g55480.1
LOC_Os10g10500.1	Os10g0184300	LOC_Os04g56160.1	AHA7
LOC_Os10g18340.1	Os10g0330000		OSA7
LOC_Os10g25780.3	Os10g0397400		OsA7
LOC_Os10g27174.1	Os10g0411700		osAHA7
LOC_Os10g27190.1	Os10g0411800		AHA7
LOC_Os10g28080.1	Os10g0416500	LOC_Os04g56350.1
LOC_Os10g28200.1	Os10g0417600	LOC_Os04g56520.2	UAM2
LOC_Os10g28230.1	Os10g0418000		OsUAM2
LOC_Os10g30580.1	Os10g0442600	LOC_Os04g56740.1
LOC_Os10g30790.2	Os10g0444700	LOC_Os04g57400.1	_
LOC_Os10g31000.2	Os10g0447100		OsMTK
LOC_Os10g33210.1	Os10g0470700		OsMTK1
LOC_Os10g34040.1	Os10g0481500	LOC_Os04g58240.1
LOC_Os10g35870.1	Os10g0502600	LOC_Os04g59394.2
LOC_Os10g36000.3	Os10g0503800	LOC_Os05g01470.2
LOC_Os10g36650.1	Os10g0510000	LOC_Os05g01600.1
LOC_Os10g36848.1	Os10g0512400	LOC_Os05g01820.1	_
LOC_Os10g39620.6	Os10g0542200		_
LOC_Os10g41960.1	Os10g0569200	LOC_Os05g01870.1
LOC_Os10g42724.1	Os10g0578000	LOC_Os05g02530.1	DHAR1
LOC_Os11g01380.1	Os11g0104866		OsDHAR1
LOC_Os11g01380.1	Os11g0104900		DHAR
LOC_Os11g01380.1	Os11g0104933	LOC_Os05g04510.1	_
LOC_Os11g01439.1	Os11g0105750		OsSAMS1
LOC_Os11g01510.3	Os11g0106400		OS-SAMS1
LOC_Os11g02610.1	Os11g0118300		OsSAMS
LOC_Os11g03270.1	Os11g0126400		SAM
LOC_Os11g04880.1	Os11g0145400	LOC_Os05g04520.1
LOC_Os11g04890.1	Os11g0145700	LOC_Os05g05680.1	ACO5
LOC_Os11g05730.1	Os11g0155900		OsACO5
LOC_Os11g06390.1	Os11g0163100	LOC_Os05g06770.1	_
LOC_Os11g06720.1	Os11g0167800		_
LOC_Os11g08300.1	Os11g0186200	LOC_Os05g07940.1	GLYI6
LOC_Os11g16590.1	Os11g0267400		OsGLYI6
LOC_Os11g18880.2	Os11g0293900		OsGLYI6.1
LOC_Os11g26850.2	Os11g0455500		OsGLYI6.2
LOC_Os11g26860.1	Os11g0455800		OsGLYI6.3
LOC_Os11g26910.1	Os11g0456300		OsGLYI6.4
LOC_Os11g30060.1	Os11g0493000		OsGLYI6.5
LOC_Os11g32650.1	Os11g0530600	LOC_Os05g08970.1
LOC_Os11g34450.1	Os11g0546900	LOC_Os05g09440.1	_
LOC_Os11g37890.1	Os11g0591100		OscytME2
LOC_Os11g42040.1	Os11g0639600	LOC_Os05g22970.1	GLYI8
LOC_Os11g47760.1	Os11g0703900		OsGLYI8
LOC_Os11g48080.1	Os11g0708500	LOC_Os05g25640.1
LOC_Os12g01160.1	Os12g0102100	LOC_Os05g27940.1
LOC_Os12g06300.1	Os12g0160300	LOC_Os05g28290.1
LOC_Os12g06510.1	Os12g0162400	LOC_Os05g28740.1	_
LOC_Os12g06610.1	Os12g0163200		UspA
LOC_Os12g06660.1	Os12g0163700	LOC_Os05g30750.1
LOC_Os12g07010.1	Os12g0167900	LOC_Os05g31750.1	_
LOC_Os12g07110.2	Os12g0168700		OsANN3
LOC_Os12g17600.1	Os12g0274700	LOC_Os05g32570.1
LOC_Os12g19030.1	Os12g0288400	LOC_Os05g33360.1
LOC_Os12g20380.1	Os12g0299200	LOC_Os05g33380.1	_
LOC_Os12g25120.1	Os12g0438000		GSC 233
LOC_Os12g25690.1	Os12g0443500		AldC-2
LOC_Os12g25700.2	Os12g0443600	LOC_Os05g33570.2	FLO4
LOC_Os12g25710.2	Os12g0443700		flo4
LOC_Os12g26290.5	Os12g0448900		flo4-2
LOC_Os12g29400.1	Os12g0478200		flo4-3
LOC_Os12g33180.1	Os12g0516700		ppdk
LOC_Os12g36830.1	Os12g0555000		OsPPDK
LOC_Os12g36850.1	Os12g0555200		PPDK1
LOC_Os12g36880.1	Os12g0555500		CPDK1
LOC_Os12g37650.1	Os12g0563600		PPDKB
LOC_Os12g40510.1	Os12g0597000		OsPPDKB
LOC_Os12g42600.1	Os12g0621000		cyOsPPDKB
LOC_Os12g42876.1	Os12g0623900		OsPBDK
LOC_Os12g42884.3	Os12g0624000		PBDK
LOC_Os12g42980.1	Os12g0625000	LOC_Os05g34270.1
LOC_Os12g43600.1	Os12g0632000	LOC_Os05g35460.1
LOC_Os12g44150.1	Os12g0638700	LOC_Os05g37330.1
LOC_Os12g44310.2	Os12g0640600	LOC_Os05g37450.1
LOC_Os01g34250.1	None	LOC_Os05g38290.1
LOC_Os02g05260.1	None	LOC_Os05g38640.1
LOC_Os02g21950.1	None	LOC_Os05g41210.1	CALA
LOC_Os03g05790.1	None		CALa*
LOC_Os03g31986.1	None		Cal1
LOC_Os03g45880.1	None		CaM-2
LOC_Os04g09370.1	None		CAM2
LOC_Os04g14580.1	None		CAM
LOC_Os04g21410.1	None		OsCaM2
LOC_Os04g50830.1	None		OsCam2
LOC_Os05g42390.1	None	LOC_Os05g41480.2
LOC_Os07g24980.1	None	LOC_Os05g44770.1
LOC_Os07g40520.1	None	LOC_Os05g45660.2
LOC_Os08g05140.1	None	LOC_Os05g46560.2
LOC_Os08g44730.1	None	LOC_Os05g48020.1
LOC_Os09g11390.1	None	LOC_Os05g49180.1
LOC_Os10g01330.1	None	LOC_Os05g49860.1
LOC_Os10g24150.1	None	LOC_Os05g49890.2
LOC_Os10g33070.1	None	LOC_Os05g50624.2
LOC_Os11g08390.1	None	LOC_Os05g51480.1
LOC_Os11g11650.1	None	LOC_Os06g01500.1
LOC_Os11g22850.1	None	LOC_Os06g02144.2	_
LOC_Os11g23950.1	None		Os6PGDH1
LOC_Os11g26330.1	None	LOC_Os06g02370.3
LOC_Os11g39270.1	None	LOC_Os06g03920.1
LOC_Os11g47080.1	None	LOC_Os06g04130.1
LOC_Os12g08725.1	None	LOC_Os06g04270.1	_
LOC_Os12g10680.1	None		_
LOC_Os12g28830.1	None	LOC_Os06g04290.1	RPS20
			rps20
		LOC_Os06g05860.1	_
			_
		LOC_Os06g07200.1
		LOC_Os06g07210.1	V3
			v3
			RNRL1
			rnrl1
		LOC_Os06g07630.1
		LOC_Os06g07878.1	_
			OsPAC1
		LOC_Os06g09450.4	RSUS2
			sus2
			RSus2(t)
			SUS2
			SS1
			OsScS1
			RSs1
			RSus2
			OsSUS2
		LOC_Os06g12690.1
		LOC_Os06g13570.1
		LOC_Os06g14370.3
		LOC_Os06g15360.1
		LOC_Os06g17440.1
		LOC_Os06g18670.1
		LOC_Os06g19070.1
		LOC_Os06g22060.1
		LOC_Os06g23440.1	EIF1A2
			OseIF1A-2
		LOC_Os06g30970.1
		LOC_Os06g34690.1
		LOC_Os06g37180.1	_
			OsVHA-B
		LOC_Os06g37440.1	EF1G2
			OsEF1G2
		LOC_Os06g39370.1
		LOC_Os06g39760.1	_
			OsWD40-130
		LOC_Os06g40040.2
		LOC_Os06g40560.1
		LOC_Os06g40640.1	_
			_
		LOC_Os06g42540.1
		LOC_Os06g43660.3	_
			OVP1
		LOC_Os06g44080.1	UBQ5
			RUB2
			OsRUB2
			NEDD8
		LOC_Os06g45120.2	_
			OsVHA-A
		LOC_Os06g49800.1
		LOC_Os06g50580.1
		LOC_Os06g51220.2	_
			HMGB1
		LOC_Os06g51350.1
		LOC_Os06g51510.1
		LOC_Os07g01860.1
		LOC_Os07g03230.1
		LOC_Os07g04840.1	PSBP
			PsbP
		LOC_Os07g05580.1
		LOC_Os07g05820.1	GLO5
			GLO4
			OsGLO4
			OsGLO5
		LOC_Os07g07690.2
		LOC_Os07g07690.2
		LOC_Os07g08840.1	TRXH
			trxh
			Trx-H
			OsTRXh1
			OsTrxh1
			Os1
			OsTrx23
			RPP13-1
		LOC_Os07g09340.1	AHA2
			OSA2
			OsA2
			osAHA2
			AHA2
		LOC_Os07g12110.1	EIF3E
			eIF-3e
			OseIF3e
		LOC_Os07g12170.1
		LOC_Os07g18050.1	C3H49
			OsC3H49
		LOC_Os07g22640.1
		LOC_Os07g26690.1	PIP2A, PIP2;1
			OsPIP2a
			PIP2-1
			PIP2a
			PIP2.1
			OsPIP2;1
		LOC_Os07g30020.1
		LOC_Os07g31280.1
		LOC_Os07g33110.2	CDPK19
			OsCDPK19
			OsCPK19
			OsCDPK2
			CPK2
		LOC_Os07g34260.1
		LOC_Os07g35310.1
		LOC_Os07g36080.3
		LOC_Os07g36140.1
		LOC_Os07g37750.1
		LOC_Os07g37750.1
		LOC_Os07g38170.1
		LOC_Os07g38840.2
		LOC_Os07g40740.1
		LOC_Os07g43170.3
		LOC_Os07g45300.1
		LOC_Os07g46370.1	_
			OsWD40-148
		LOC_Os07g46790.1
		LOC_Os07g47510.1
		LOC_Os07g49330.3
		LOC_Os07g49400.1	APX2
			OsAPX2
			OsAPx02
			APXb
			OsAPx2
			OSAPX2
			APx2
		LOC_Os08g02120.1	_
			OsFKII
		LOC_Os08g02340.1
		LOC_Os08g02700.1
		LOC_Os08g03290.1	GAPC
			_
		LOC_Os08g03350.1	_
			OsHT
		LOC_Os08g03640.1	_
			YK704
		LOC_Os08g05690.1	MDR15
			OsABCB20
			OsPGP20
			OsMDR15
		LOC_Os08g06100.1	COMT, ROMT9
			ROMT-9
			OsCOMT1
			COMT
		LOC_Os08g06380.1	CSLF6
			OsCslF6
		LOC_Os08g06550.1	_
			_
		LOC_Os08g07900.1
		LOC_Os08g09240.1	ATG8C
			OsATG8c
		LOC_Os08g09250.1	GLYI-11
			OsGLYI11
			GLYI11
			OsGLYII1.1
			OsGLYI11.2
			OsGLYI11.3
			OsGLYI-11.2
		LOC_Os08g13060.1
		LOC_Os08g15230.1
		LOC_Os08g17400.1	WRKY89
			OsWRKY89
		LOC_Os08g22354.2	_
			Cen8.t01003
			Cen8.t01009
		LOC_Os08g25734.2	AGPS2A
			OsAGPS2a
			AGPS2
			OsAGPS2
			osagps2
			APS2
			APS2a
			APS2b
			AGPS2a
			APGS2b
			OsAGPS2b
			AGPP
		LOC_Os08g27070.1
		LOC_Os08g27840.1	_
			Osppc
			OSPPC
		LOC_Os08g33370.2	GF14C
			GF14c
			OsGF14c
		LOC_Os08g34210.1	_
			_
		LOC_Os08g35480.1
		LOC_Os08g38300.1
		LOC_Os08g38900.1	_
			OsOMT26
			ROMT-15
			ROMT15
		LOC_Os08g39140.1	HSP82A
			OsHSP82A
			hsp82A
		LOC_Os08g39850.1	LOX8
			OsLOX8
		LOC_Os08g41390.2	_
			OsFKBP62a
			OsFKBP64
		LOC_Os08g42540.1
		LOC_Os08g42740.3
		LOC_Os08g43120.1	PDR1
			OsABCG45
			OsPDR1
		LOC_Os09g02700.1
		LOC_Os09g07830.2
		LOC_Os09g10300.1
		LOC_Os09g14670.1
		LOC_Os09g26460.1
		LOC_Os09g29200.1	GSTU17
			OsGSTU17
		LOC_Os09g30418.1
		LOC_Os09g30418.1
		LOC_Os09g31019.1
		LOC_Os09g31031.2
		LOC_Os09g31080.3
		LOC_Os09g33820.3
		LOC_Os09g33930.3
		LOC_Os09g35710.1
		LOC_Os09g36770.2
		LOC_Os09g38030.2	UGP1
			Ugp1
			OsUgp1
			UGP2
			UGP3
		LOC_Os09g38090.1
		LOC_Os09g39670.1
		LOC_Os10g08550.3	_
			OsEE1
			OsENO1
		LOC_Os10g08930.1
		LOC_Os10g10244.1
		LOC_Os10g10500.1
		LOC_Os10g18340.1
		LOC_Os10g25780.3	BRD2
			brd2
			Dim/dwf1
			Dim
			dwf1
		LOC_Os10g27174.1
		LOC_Os10g27190.1
		LOC_Os10g28080.1	_
			Oschib1
			PR-8
			PR8
		LOC_Os10g28200.1
		LOC_Os10g28230.1
		LOC_Os10g30580.1
		LOC_Os10g30790.2	PT8
			OsPT8
			PHT1-8
			OsPht1;8
		LOC_Os10g31000.2
		LOC_Os10g33210.1	PTR3
			OsPTR3
		LOC_Os10g34040.1
		LOC_Os10g35870.1
		LOC_Os10g36000.3
		LOC_Os10g36650.1	_
			RAc2
		LOC_Os10g36848.1
		LOC_Os10g39620.6
		LOC_Os10g41960.1
		LOC_Os10g42724.1
		LOC_Os11g01380.1
		LOC_Os11g01380.1
		LOC_Os11g01380.1
		LOC_Os11g01439.1
		LOC_Os11g01510.3
		LOC_Os11g02610.1
		LOC_Os11g03270.1
		LOC_Os11g04880.1
		LOC_Os11g04890.1
		LOC_Os11g05730.1	_
			H3R-21
		LOC_Os11g06390.1
		LOC_Os11g06720.1	ASR5
			ASR5
			Asr5
			Asr1
			OsASR1
		LOC_Os11g08300.1
		LOC_Os11g16590.1	CLPC3
			ClpC3
		LOC_Os11g18880.2
		LOC_Os11g26850.2	_
			_
		LOC_Os11g26860.1
		LOC_Os11g26910.1	_
			OSK1
		LOC_Os11g30060.1
		LOC_Os11g32650.1	CHS
			CHS*
			Oschs
			chs
			chas
			OsCHS
		LOC_Os11g34450.1	GF14D
			GF14d
			OsGF14d
			Os14-3-3
		LOC_Os11g37890.1
		LOC_Os11g42040.1
		LOC_Os11g47760.1	_
			HSP70
			hsp70
		LOC_Os11g48080.1
		LOC_Os12g01160.1
		LOC_Os12g06300.1
		LOC_Os12g06510.1	CBL6
			OsCBL6
		LOC_Os12g06610.1
		LOC_Os12g06660.1
		LOC_Os12g07010.1	RPL3A
			OsRPL3A
		LOC_Os12g07110.2
		LOC_Os12g17600.1	RBCS
			rbcS
			RBCS-C
			RbcS2
			OsRBCS2
			RbcS1
			OsRbcS2
		LOC_Os12g19030.1
		LOC_Os12g20380.1
		LOC_Os12g25120.1
		LOC_Os12g25690.1
		LOC_Os12g25700.2
		LOC_Os12g25710.2
		LOC_Os12g26290.5	_
			PIOX
			RalphaO
		LOC_Os12g29400.1	_
			OsABA45
		LOC_Os12g33180.1
		LOC_Os12g36830.1	_
			RSOsPR10
			RsOsPR10a
			OsPR10a
			OsPR10alpha
		LOC_Os12g36850.1	PR10B
			RPR10b
			PR-10b
			PR10b
			PBZ1
			PBZ-1
		LOC_Os12g36880.1	PR10A
			PBZ1
			OsPR10a
			RPR10a
			PR-10a
			PR10a
			PR10
			OsPR10A
			OsPR-10a
			OsPR10
			PR10/PBZ1
		LOC_Os12g37650.1
		LOC_Os12g40510.1	CBL2
			OsCBL2
		LOC_Os12g42600.1
		LOC_Os12g42876.1
		LOC_Os12g42884.3
		LOC_Os12g42980.1	RCS1
			rcs1
		LOC_Os12g43600.1	_
			GRP162
		LOC_Os12g44150.1	AHA3
			OSA3
			OsA3
			osAHA3
			AHA3
			PAM3
		LOC_Os12g44310.2
